# Supplementary material for: Immunosenescence profile is associated with increased susceptibility to severe COVID-19
Source: bioRxiv or medRxiv preprint supplement (doi:10.1101/2024.11.18.24317502), 2024-12-16
Supplement: Supplementary file [file media-1.pdf]

**Supplementary Table 1: Who criteria for the clinical groups**

| <i>Patient State</i>     | <i>Descriptor</i>                                                                         | <i>Score</i> |
|--------------------------|-------------------------------------------------------------------------------------------|--------------|
| <i>Uninfected</i>        | Uninfected; no viral RNA detected.                                                        | 0            |
| <i>COVID-19 Mild</i>     | Asymptomatic; viral RNA detected.                                                         | 1            |
|                          | Symptomatic; Independent.                                                                 | 2            |
|                          | Symptomatic; Assistance needed.                                                           | 3            |
| <i>COVID-19 Moderate</i> | Hospitalised; No oxygen therapy.                                                          | 4            |
|                          | Hospitalised; Oxygen by mask or nasal prongs.                                             | 5            |
| <i>COVID-19 Severe</i>   | Hospitalised; Oxygen by NIV or high flow.                                                 | 6            |
|                          | Intubation and mechanical ventilation, $pO_2/FiO_2 \geq 150$ or $SpO_2/FiO_2 \geq 200$ ). | 7            |
|                          | Mechanical ventilation, $pO_2/FiO_2 < 200$ ) or vasopressor.                              | 8            |
|                          | Mechanical ventilation, $pO_2/FiO_2 < 150$ and vasopressor, dialysis or ECMO.             | 9            |
|                          | Dead.                                                                                     | 10           |

**Supplementary Table 2: Panel of mAbs for flow cytometry**

|                      | <b>Antibody</b> | <b>Channel</b> | <b>Dilution Used</b> | <b>Catalog Number</b> | <b>Clone</b> |
|----------------------|-----------------|----------------|----------------------|-----------------------|--------------|
| <b>T Cell Panel</b>  | CD4             | Pe Cy 7        | 1:400                | 557852                | SK3          |
|                      | CD8             | PE-Dazzle 594  | 1:1200               | 562282                | RPA-T8       |
|                      | CD25            | PE             | 1:20                 | 555432                | M-A251       |
|                      | CD278 (ICOS)    | Percp Cy 5.5   | 1:20                 | 562833                | DX29         |
|                      | CD57            | BV 421         | 1:800                | 563896                | NK-1         |
|                      | CD279 (PD-1)    | BV 605         | 1:40                 | 563245                | EH12.1       |
|                      | TIGIT           | BV 650         | 1:160                | 741182                | FAB7898G     |
|                      | CD28            | APC H7         | 1:20                 | 561368                | CD28.2       |
|                      | CD3             | AF 700         | 1:320                | 317340                | OKT3         |
|                      | CCR7            | FITC           | 1:40                 | 353216                | G943H7       |
|                      | KLRG-1          | BV 711         | 1:40                 | 138427                | 2F1/KLRG1    |
|                      | FOXP3           | APC Cy7        | 1:20                 | 21276106              | 3G3          |
|                      | CD45RO          | BV 785         | 1:80                 | 304234                | UCHL1        |
| <b>NK Cell Panel</b> | CD3             | AF 700         | 1:320                | 317340                | OKT3         |
|                      | CD16            | PE Cy 5.5      | 1:100                | 555408                | 3G8          |
|                      | CD25            | PE             | 1:20                 | 555432                | M-A251       |
|                      | CD56            | PE Cy 7        | 1:200                | 340723                | NCAM 16.2    |
|                      | CD57            | BV 421         | 1:640                | 563896                | NK-1         |
|                      | CD69            | APC Cy7        | 1:20                 | 557756                | FN50         |
|                      | CD 279 (PD-1)   | BV 605         | 1:40                 | 563245                | EH12.1       |
|                      | NKG2D           | APC            | 1:20                 | 558071                | 1D11         |
| <b>B Cell Panel</b>  | CD24            | FITC           | 1:160                | 555427                | ML5          |
|                      | CD 279 (PD-1)   | BV 605         | 1:40                 | 563245                | EH12.1       |
|                      | CD38            | PE             | 1:20                 | 555460                | HIT2         |
|                      | CD5             | Percp Cy 5.5   | 1:80                 | 341089                | L17F12       |
|                      | CD19            | PE Cy 7        | 1:640                | 557835                | SJ25C1       |
|                      | IgD             | AF 700         | 1:40                 | 561302                | IA6-2        |
|                      | CD138           | APC            | 1:20                 | 347193                | MI15         |
|                      | CD27            | APC Cy7        | 1:20                 | 560222                | M-T271       |
|                      | CD20            | BV 650         | 1:800                | 563780                | 2H7          |

**Supplementary Table 3: Panel of mAbs for flow cytometry**

| City                 | Clinical Outcome | Sample | Raw read  | Pre-processed reads* | Annotated reads | Clones |
|----------------------|------------------|--------|-----------|----------------------|-----------------|--------|
| Belo Horizonte       | Control          | A04    | 406,894   | 246,973              | 244,359         | 16,300 |
| Belo Horizonte       | Control          | A20    | 618,809   | 420,539              | 418,354         | 12,662 |
| Belo Horizonte       | Control          | A24    | 1,362,447 | 411,169              | 403,966         | 9,567  |
| Belo Horizonte       | Control          | A65    | 555,155   | 348,297              | 344,143         | 15,331 |
| Belo Horizonte       | Control          | A66    | 761,554   | 478,945              | 472,011         | 17,086 |
| Belo Horizonte       | Control          | A67    | 546,518   | 354,867              | 350,617         | 31,830 |
| Governador Valadares | Mild             | GV106  | 537,812   | 255,051              | 199,460         | 6,956  |
| Governador Valadares | Mild             | GV144  | 349,768   | 215,476              | 193,437         | 9,710  |
| Governador Valadares | Mild             | GV146  | 1,450,041 | 398,780              | 395,181         | 9,087  |
| Governador Valadares | Mild             | GV43   | 906,435   | 279,639              | 271,681         | 13,703 |
| Governador Valadares | Mild             | GV47   | 544,092   | 202,199              | 159,930         | 6,907  |
| Governador Valadares | Mild             | GV50   | 1,332,292 | 299,198              | 236,633         | 8,494  |
| Governador Valadares | Mild             | GV51   | 1,477,827 | 306,737              | 295,683         | 8,186  |
| Governador Valadares | Mild             | GV54   | 628,211   | 264,316              | 245,602         | 8,940  |
| Governador Valadares | Mild             | GV68   | 558,832   | 344,804              | 338,562         | 13,168 |
| Governador Valadares | Mild             | GV92   | 487,172   | 203,943              | 130,060         | 3,053  |
| Belo Horizonte       | Mild             | ID094  | 620,176   | 410,089              | 408,93          | 7,021  |
| Belo Horizonte       | Mild             | ID117  | 540,888   | 341,650              | 340,256         | 13,239 |
| Belo Horizonte       | Mild             | ID124  | 632,642   | 427,965              | 422,618         | 36,806 |
| Belo Horizonte       | Mild             | ID131  | 536,784   | 311,349              | 304,709         | 9,865  |
| Belo Horizonte       | Mild             | ID132  | 436,757   | 264,768              | 262,704         | 32,069 |
| Belo Horizonte       | Hospitalized     | ID141  | 412,936   | 235,970              | 233,636         | 10,807 |
| Belo Horizonte       | Hospitalized     | ID143  | 341,073   | 232,296              | 231,034         | 11,192 |
| Belo Horizonte       | Hospitalized     | ID144  | 510,649   | 347,086              | 337,768         | 9,042  |
| Belo Horizonte       | Mild             | ID155  | 557,750   | 323,370              | 311,478         | 14,827 |
| Belo Horizonte       | Hospitalized     | ID187  | 563,901   | 295,370              | 284,909         | 26,310 |
| Belo Horizonte       | Hospitalized     | ID195  | 406,167   | 233,411              | 229,688         | 6,807  |
| Belo Horizonte       | Hospitalized     | ID226  | 1,525,890 | 333,602              | 330,351         | 15,422 |
| Belo Horizonte       | Mild             | ID240  | 407,527   | 236,377              | 229,633         | 8,234  |
| Belo Horizonte       | Mild             | ID244  | 430,185   | 260,499              | 256,455         | 18,387 |
| Belo Horizonte       | Hospitalized     | ID248  | 405,371   | 277,585              | 272,233         | 18,185 |
| Belo Horizonte       | Hospitalized     | ID268  | 285,341   | 180,243              | 179,320         | 30,896 |
| Belo Horizonte       | Hospitalized     | ID310  | 638,973   | 418,567              | 417,669         | 14,627 |
| Belo Horizonte       | Hospitalized     | ID375  | 638,037   | 379,779              | 374,808         | 69,737 |
| São Paulo            | Hospitalized     | SP10   | 386,469   | 205,262              | 194,655         | 23,650 |
| São Paulo            | Hospitalized     | SP114  | 429,407   | 243,112              | 238,327         | 9,007  |
| São Paulo            | Hospitalized     | SP138  | 790,021   | 550,456              | 548,060         | 23,304 |
| São Paulo            | Mild             | SP14   | 521,830   | 324,709              | 321,397         | 41,497 |
| São Paulo            | Hospitalized     | SP20   | 639,344   | 366,906              | 363,329         | 12,671 |

\*Reads after steps 1, 2, and 3 of pre-processing.

**Supplementary Table 4: Summary of Vlg sequences (repertoire)**

|    | <b>NAME</b>      | <b>SEQUENCE (5' TO 3')</b>                                       |
|----|------------------|------------------------------------------------------------------|
| 1  | VH1-fwd          | <b>TCGTCGGCAGCGTCAGATGTGTATAAGAGACAG</b> CAGGTCCAGCTKGTRCAGTCTGG |
| 2  | VH157-fwd        | <b>TCGTCGGCAGCGTCAGATGTGTATAAGAGACAG</b> CAGGTGCAGCTGGTGSARTCTGG |
| 3  | VH2-fwd          | <b>TCGTCGGCAGCGTCAGATGTGTATAAGAGACAG</b> CAGRTCACCTTGAAGGAGTCTG  |
| 4  | VH3-fwd          | <b>TCGTCGGCAGCGTCAGATGTGTATAAGAGACAG</b> GAGGTGCAGCTGKTGGAGWCY   |
| 5  | VH4-fwd          | <b>TCGTCGGCAGCGTCAGATGTGTATAAGAGACAG</b> CAGGTGCAGCTGCAGGAGTCSG  |
| 6  | VH4-DP63-<br>fwd | <b>TCGTCGGCAGCGTCAGATGTGTATAAGAGACAG</b> CAGGTGCAGCTACAGCAGTGGG  |
| 7  | VH6-fwd          | <b>TCGTCGGCAGCGTCAGATGTGTATAAGAGACAG</b> CAGGTACAGCTGCAGCAGTCA   |
| 8  | VH3N-fwd         | <b>TCGTCGGCAGCGTCAGATGTGTATAAGAGACAG</b> TCAACACAACGGTTCCCAGTTA  |
| 9  | IgG-rev          | <b>GTCTCGTGGGCTCGGAGATGTGTATAAGAGACAG</b> AGGGYGCCAGGGGGAAGAC    |
| 10 | IgA-rev          | <b>GTCTCGTGGGCTCGGAGATGTGTATAAGAGACAG</b> CGGGAAGACCTTGGGGCTGG   |

The bold sequences constitute elements of the Illumina adaptor sequences. The design of the annealing region in primers was based on MacDaniel et al. (2016).

**Supplementary Table 5: Summary of Biomarkers of Network Analysis**

| <b>ID</b>      | <b>BIOMARKER</b>                                               |
|----------------|----------------------------------------------------------------|
| 1L             | CCL11 (Luminex)                                                |
| 2L             | CXCL8 (Luminex)                                                |
| 3L             | CCL2 (Luminex)                                                 |
| 4L             | CCL3 (Luminex)                                                 |
| 5L             | CCL4 (Luminex)                                                 |
| 6L             | CCL5 (Luminex)                                                 |
| 7L             | CXCL10 (Luminex)                                               |
| 8PI            | IL-1 $\beta$ (Luminex)                                         |
| 9PI            | IL-6 (Luminex)                                                 |
| 10PI           | TNF (Luminex)                                                  |
| 11PI           | IL-12(p70) (Luminex)                                           |
| 12PI           | IFN- $\gamma$ (Luminex)                                        |
| 13PI           | IL-15 (Luminex)                                                |
| 14PI           | 17-A (Luminex)                                                 |
| 15R            | IL-1Ra (Luminex)                                               |
| 16R            | IL-4 (Luminex)                                                 |
| 17R            | IL-5 (Luminex)                                                 |
| 18R            | IL-9 (Luminex)                                                 |
| 19R            | IL-10 (Luminex)                                                |
| 20R            | IL-13 (Luminex)                                                |
| 21GF           | FGF-basic (Luminex)                                            |
| 22GF           | VEGF (Luminex)                                                 |
| 23GF           | PDGF-BB (Luminex)                                              |
| 24GF           | G-CSF (Luminex)                                                |
| 25GF           | GM-CSF (Luminex)                                               |
| 26GF           | IL-7 (Luminex)                                                 |
| 27GF           | IL-2 (Luminex)                                                 |
| 1C             | CCL2 (CBA)                                                     |
| 2C             | CCL5 (CBA)                                                     |
| 3C             | CXCL8 (CBA)                                                    |
| 4C             | CXCL9 (CBA)                                                    |
| 5C             | CXCL10 (CBA)                                                   |
| AGE            | Age                                                            |
| <b>OUTCOME</b> | <b>Outcome</b>                                                 |
| 1T             | Total Cells                                                    |
| 2T             | Total Live Cells                                               |
| 3T             | Lymphocytes                                                    |
| 4T             | Lymphocytes Live                                               |
| 5T             | Lymphocytes CD3+                                               |
| 6T             | Lymphocytes CD3+CD4+                                           |
| 7T             | Lymphocytes CD3+CD4+CD25(High)                                 |
| 8T             | Lymphocytes CD3+CD4+CD25(Low)                                  |
| 9T             | Lymphocytes CD3+CD4+CD25+FOXP3+                                |
| 10T            | Lymphocytes CD3+CD4+CD25+FOXP3+PD1+                            |
| 11T            | Lymphocytes CD3+CD4+CD28-CD4+                                  |
| 12T            | Lymphocytes CD3+CD4+CD28-CD4+/CD4+CD28-CD57+                   |
| 13T            | Lymphocytes CD3+CD4+CD28-CD4+/CD4+CD28-KLRG1+                  |
| 14T            | Lymphocytes CD3+CD4+CD28-CD4+/CD4+CD28-PD-1+                   |
| 15T            | Lymphocytes CD3+CD4+CD28-CD4+/CD4+CD28-TIGIT+                  |
| 16T            | Lymphocytes CD3+CD4+CD28-CD4+/Q1:CD57-KLRG1+                   |
| 17T            | Lymphocytes CD3+CD4+CD28-CD4+/Q2:CD57+KLRG1+                   |
| 18T            | Lymphocytes CD3+CD4+CD28-CD4+/Q3:CD57+KLRG1-                   |
| 19T            | Lymphocytes CD3+CD4+CD28-CD4+/Q4:CD57-KLRG1-                   |
| 20T            | Lymphocytes CD3+CD4+/CD57+CD4+                                 |
| 21T            | Lymphocytes CD3+CD4+/CM CD4+                                   |
| 22T            | Lymphocytes CD3+CD4+/EFF CD4+                                  |
| 23T            | Lymphocytes CD3+CD4+/EFF CD4+/ CD4+ EFF CD28-                  |
| 24T            | Lymphocytes CD3+CD4+/EFF CD4+/ CD4+ EFF CD28-/ Q1: CD57-KLRG1+ |
| 25T            | Lymphocytes CD3+CD4+/EFF CD4+/ CD4+ EFF CD28-/ Q2: CD57+KLRG1+ |
| 26T            | Lymphocytes CD3+CD4+/EFF CD4+/ CD4+ EFF CD28-/ Q4: CD57+KLRG1- |
| 27T            | Lymphocytes CD3+CD4+/EFF CD4+/ CD4+ EFF CD28-/ Q4: CD57-KLRG1- |
| 28T            | Lymphocytes CD3+CD4+/EM CD4+                                   |

|     |                                                                      |
|-----|----------------------------------------------------------------------|
| 29T | Lymphocytes CD3+CD4+/EM CD4+/ EM CD28- CD45RO+                       |
| 30T | Lymphocytes CD3+CD4+/EM CD4+/ EM CD28- CD45RO+/ CD4+ EM CD28-CD57+   |
| 31T | Lymphocytes CD3+CD4+/EM CD4+/ EM CD28- CD45RO+/ CD4+ EM CD28-KLRG1+  |
| 32T | Lymphocytes CD3+CD4+/EM CD4+/ EM CD28- CD45RO+/ CD4+ EM CD28- PD-1+  |
| 33T | Lymphocytes CD3+CD4+/EM CD4+/ EM CD28- CD45RO+/ Q1: CD57-KLRG1+      |
| 34T | Lymphocytes CD3+CD4+/EM CD4+/ EM CD28- CD45RO+/ Q2: CD57+KLRG1+      |
| 35T | Lymphocytes CD3+CD4+/EM CD4+/ EM CD28- CD45RO+/ Q3: CD57+KLRG1-      |
| 36T | Lymphocytes CD3+CD4+/EM CD4+/ EM CD28- CD45RO+/ Q4: CD57-KLRG1-      |
| 37T | Lymphocytes CD3+CD4+/EM CD4+/ EM CD28- CD45RO+/ Q5: CD57-ICOS+       |
| 38T | Lymphocytes CD3+CD4+/EM CD4+/ EM CD28- CD45RO+/ Q6: CD57+ICOS+       |
| 39T | Lymphocytes CD3+CD4+/EM CD4+/ EM CD28- CD45RO+/ Q7: CD57+ICOS-       |
| 40T | Lymphocytes CD3+CD4+/EM CD4+/ EM CD28- CD45RO+/ Q8: CD57-ICOS-       |
| 41T | Lymphocytes CD3+CD4+/ KLRG1+CD4+                                     |
| 42T | Lymphocytes CD3+CD4+/ NAÏVE CD4+                                     |
| 43T | Lymphocytes CD3+CD4+/ PD-1+CD4+                                      |
| 44T | Lymphocytes CD3+CD4+/ Q1: CD57- PD-1+                                |
| 45T | Lymphocytes CD3+CD4+/ Q2: CD57+ PD-1+                                |
| 46T | Lymphocytes CD3+CD4+/ Q3: CD57+ PD-1-                                |
| 47T | Lymphocytes CD3+CD4+/ Q4: CD57- PD-1-                                |
| 48T | Lymphocytes CD3+CD4+/ Q5: CD57- TIGIT+                               |
| 49T | Lymphocytes CD3+CD4+/ Q6: CD57+ TIGIT+                               |
| 50T | Lymphocytes CD3+CD4+/ Q7: CD57+ TIGIT-                               |
| 51T | Lymphocytes CD3+CD4+/ Q8: CD57- TIGIT-                               |
| 52T | Lymphocytes CD3+CD4+/ Q9: KLRG1- PD-1+                               |
| 53T | Lymphocytes CD3+CD4+/ Q10: KLRG1+ PD-1+                              |
| 54T | Lymphocytes CD3+CD4+/ Q11: KLRG1+ PD-1-                              |
| 55T | Lymphocytes CD3+CD4+/ Q12: KLRG1- PD-1-                              |
| 56T | Lymphocytes CD3+CD4+/ TIGIT+ CD4+                                    |
| 57T | Lymphocytes CD3+CD8+                                                 |
| 58T | Lymphocytes CD3+CD8+/ CD8+CD28+                                      |
| 59T | Lymphocytes CD3+CD8+/ CD8+CD28+/ CD8+CD28+CD57+                      |
| 60T | Lymphocytes CD3+CD8+/ CD8+CD28+/ CD8+CD28+ICOS+                      |
| 61T | Lymphocytes CD3+CD8+/ CD8+CD28+/ CD8+CD28+KLRG1+                     |
| 62T | Lymphocytes CD3+CD8+/ CD8+CD28+/ CD8+CD28+PD-1+                      |
| 63T | Lymphocytes CD3+CD8+/ CD8+CD28+/ Q1:CD57- KLRG1+                     |
| 64T | Lymphocytes CD3+CD8+/ CD8+CD28+/ Q2:CD57+ KLRG1+                     |
| 65T | Lymphocytes CD3+CD8+/ CD8+CD28+/ Q3:CD57+ KLRG1-                     |
| 66T | Lymphocytes CD3+CD8+/ CD8+CD28+/ Q4:CD57- KLRG1-                     |
| 67T | Lymphocytes CD3+CD8+/ CD8+CD28+/ Q5:CD57- PD-1+                      |
| 68T | Lymphocytes CD3+CD8+/ CD8+CD28+/ Q6:CD57+ PD-1+                      |
| 69T | Lymphocytes CD3+CD8+/ CD8+CD28+/ Q7:CD57+ PD-1-                      |
| 70T | Lymphocytes CD3+CD8+/ CD8+CD28+/ Q8:CD57- PD-1-                      |
| 71T | Lymphocytes CD3+CD8+/ CD8+CD57+                                      |
| 72T | Lymphocytes CD3+CD8+/ CD8+ICOS+                                      |
| 73T | Lymphocytes CD3+CD8+/ CD8+KLRG1+                                     |
| 74T | Lymphocytes CD3+CD8+/ CD8+NAÏVE                                      |
| 75T | Lymphocytes CD3+CD8+/ CD8+PD-1+                                      |
| 76T | Lymphocytes CD3+CD8+/ CD8+TIGIT+                                     |
| 77T | Lymphocytes CD3+CD8+/ CD28-CD8+                                      |
| 78T | Lymphocytes CD3+CD8+/ CD28-CD8+/ CD8+CD28-CD57+                      |
| 79T | Lymphocytes CD3+CD8+/ CD28-CD8+/ CD8+CD28-ICOS+                      |
| 80T | Lymphocytes CD3+CD8+/ CD28-CD8+/ CD8+CD28-KLRG1+                     |
| 81T | Lymphocytes CD3+CD8+/ CD28-CD8+/ CD8+CD28-PD-1+                      |
| 82T | Lymphocytes CD3+CD8+/ CD28-CD8+/ CD8+CD28-TIGIT+                     |
| 83T | Lymphocytes CD3+CD8+/ CD28-CD8+/ Q1: CD57- KLRG1+                    |
| 84T | Lymphocytes CD3+CD8+/ CD28-CD8+/ Q2: CD57+ KLRG1+                    |
| 85T | Lymphocytes CD3+CD8+/ CD28-CD8+/ Q3: CD57+ KLRG1-                    |
| 86T | Lymphocytes CD3+CD8+/ CD28-CD8+/ Q4: CD57- KLRG1-                    |
| 87T | Lymphocytes CD3+CD8+/ CM CD8+                                        |
| 88T | Lymphocytes CD3+CD8+/ EFF CD8+                                       |
| 89T | Lymphocytes CD3+CD8+/ EFF CD8+/ CD8+ EFF CD28-                       |
| 90T | Lymphocytes CD3+CD8+/ EFF CD8+/ CD8+ EFF CD28-/ CD8+ EFF CD28-CD57+  |
| 91T | Lymphocytes CD3+CD8+/ EFF CD8+/ CD8+ EFF CD28-/ CD8+ EFF CD28-KLRG1+ |
| 92T | Lymphocytes CD3+CD8+/ EFF CD8+/ CD8+ EFF CD28-/ CD8+ EFF CD28-PD-1+  |

|      |                                                                      |
|------|----------------------------------------------------------------------|
| 93T  | Lymphocytes CD3+CD8+/ EFF CD8+/ CD8+ EFF CD28-/ CD8+ EFF CD28-TIGIT+ |
| 94T  | Lymphocytes CD3+CD8+/ EFF CD8+/ CD8+ EFF CD28-/ Q2: CD57+ KLRG1+     |
| 95T  | Lymphocytes CD3+CD8+/ EFF CD8+/ CD8+ EFF CD28-/ Q3: CD57+ KLRG1-     |
| 96T  | Lymphocytes CD3+CD8+/ EFF CD8+/ CD8+ EFF CD28-/ Q4: CD57- KLRG1-     |
| 97T  | Lymphocytes CD3+CD8+/ EFF CD8+/ CD8+ EFF CD28-/ Q5: CD57- PD-1+      |
| 98T  | Lymphocytes CD3+CD8+/ EFF CD8+/ CD8+ EFF CD28-/ Q6: CD57+ PD-1+      |
| 99T  | Lymphocytes CD3+CD8+/ EFF CD8+/ CD8+ EFF CD28-/ Q7: CD57+ PD-1-      |
| 100T | Lymphocytes CD3+CD8+/ EFF CD8+/ CD8+ EFF CD28-/ Q8: CD57- PD-1-      |
| 101T | Lymphocytes CD3+CD8+/ EFF CD8+/ CD8+ EFF CD28-/ Q9: CD57- ICOS+      |
| 102T | Lymphocytes CD3+CD8+/ EFF CD8+/ CD8+ EFF CD28-/ Q10: CD57+ ICOS+     |
| 103T | Lymphocytes CD3+CD8+/ EFF CD8+/ CD8+ EFF CD28-/ Q11: CD57+ ICOS-     |
| 104T | Lymphocytes CD3+CD8+/ EFF CD8+/ CD8+ EFF CD28-/ Q12: CD57- ICOS-     |
| 105T | Lymphocytes CD3+CD8+/ EFF CD8+/ CD8+ EFF CD28-/ Q1: CD57- KLRG1+     |
| 106T | Lymphocytes CD3+CD8+/ EFF CD8+/ CD8+ EFF CD57+                       |
| 107T | Lymphocytes CD3+CD8+/ EFF CD8+/ CD8+ EFF PD-1+                       |
| 108T | Lymphocytes CD3+CD8+/ EFF CD8+/ CD8+ EFF TIGIT+                      |
| 109T | Lymphocytes CD3+CD8+/ EFF CD8+/ Q1: CD57- TIGIT+                     |
| 110T | Lymphocytes CD3+CD8+/ EFF CD8+/ Q2: CD57+ TIGIT+                     |
| 111T | Lymphocytes CD3+CD8+/ EFF CD8+/ Q3: CD57+ TIGIT-                     |
| 112T | Lymphocytes CD3+CD8+/ EFF CD8+/ Q4: CD57- TIGIT-                     |
| 113T | Lymphocytes CD3+CD8+/ EM CD8+                                        |
| 114T | Lymphocytes CD3+CD8+/ EM CD8+/ CD8+ EM CD57+                         |
| 115T | Lymphocytes CD3+CD8+/ EM CD8+/ CD8+ EM ICOS+                         |
| 116T | Lymphocytes CD3+CD8+/ EM CD8+/ CD8+ EM KLRG1+                        |
| 117T | Lymphocytes CD3+CD8+/ EM CD8+/ CD8+ EM PD-1+                         |
| 118T | Lymphocytes CD3+CD8+/ EM CD8+/ CD8+ EM TIGIT+                        |
| 119T | Lymphocytes CD3+CD8+/ EM CD8+/ CD28- CD45RO+                         |
| 120T | Lymphocytes CD3+CD8+/ EM CD8+/ CD28- CD45RO+/ CD8+ EM CD28-CD57+     |
| 121T | Lymphocytes CD3+CD8+/ EM CD8+/ CD28- CD45RO+/ CD8+ EM CD28-KLRG1+    |
| 122T | Lymphocytes CD3+CD8+/ EM CD8+/ CD28- CD45RO+/ CD8+ EM CD28-PD-1+     |
| 123T | Lymphocytes CD3+CD8+/ EM CD8+/ CD28- CD45RO+/ Q2: CD57+ KLRG1+       |
| 124T | Lymphocytes CD3+CD8+/ EM CD8+/ CD28- CD45RO+/ Q3: CD57+ KLRG1-       |
| 125T | Lymphocytes CD3+CD8+/ EM CD8+/ CD28- CD45RO+/ Q4: CD57- KLRG1-       |
| 126T | Lymphocytes CD3+CD8+/ EM CD8+/ CD28- CD45RO+/ Q5: CD57- PD-1+        |
| 127T | Lymphocytes CD3+CD8+/ EM CD8+/ CD28- CD45RO+/ Q6: CD57+ PD-1+        |
| 128T | Lymphocytes CD3+CD8+/ EM CD8+/ CD28- CD45RO+/ Q8: CD57- PD-1-        |
| 129T | Lymphocytes CD3+CD8+/ EM CD8+/ CD28- CD45RO+/ Q9: ICOS- TIGIT+       |
| 130T | Lymphocytes CD3+CD8+/ EM CD8+/ CD28- CD45RO+/ Q10: ICOS+ TIGIT+      |
| 131T | Lymphocytes CD3+CD8+/ EM CD8+/ CD28- CD45RO+/ Q11: ICOS+ TIGIT-      |
| 132T | Lymphocytes CD3+CD8+/ EM CD8+/ CD28- CD45RO+/ Q12: ICOS- TIGIT-      |
| 133T | Lymphocytes CD3+CD8+/ EM CD8+/ CD28- CD45RO+/ Q13: CD57- TIGIT+      |
| 134T | Lymphocytes CD3+CD8+/ EM CD8+/ CD28- CD45RO+/ Q14: CD57+ TIGIT+      |
| 135T | Lymphocytes CD3+CD8+/ EM CD8+/ CD28- CD45RO+/ Q15: CD57+ TIGIT-      |
| 136T | Lymphocytes CD3+CD8+/ EM CD8+/ CD28- CD45RO+/ Q16: CD57- KLRG1-      |
| 137T | Lymphocytes CD3+CD8+/ EM CD8+/ CD28- CD45RO+/ Q1: CD57- KLRG1+       |
| 138T | Lymphocytes CD3+CD8+/ EM CD8+/ Q1: CD57- PD-1+                       |
| 139T | Lymphocytes CD3+CD8+/ EM CD8+/ Q2: CD57+ PD-1+                       |
| 140T | Lymphocytes CD3+CD8+/ EM CD8+/ Q3: CD57+ PD-1-                       |
| 141T | Lymphocytes CD3+CD8+/ EM CD8+/ Q4: CD57- PD-1-                       |
| HRV  | Horvath's clock                                                      |
| TL   | Telomere Length's clock                                              |
| BLU  | BLUP clock                                                           |
| SHM  | Shannon's Entropy                                                    |

Summary representing the code for each biomarker used in the network analysis and the corresponding mediator.
